# Supplementary material for: Atomic insights into the mechanisms of Al3+ or Cr3+ affecting ferrihydrite nucleation
Source: Royal Society of Chemistry journal article supplement (doi:10.1039/d3ra02945j), 2023-01-01
Supplement: d3ra02945j1.pdf [file d3ra02945j1.pdf]

Atomic insights into the mechanisms of  $\text{Al}^{3+}$  or  $\text{Cr}^{3+}$  affecting ferrihydrite  
nucleation

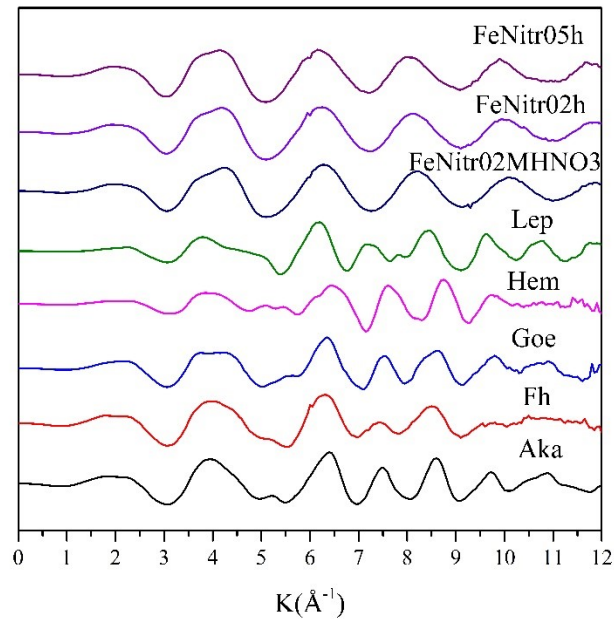

**S.I. 1** EXAFS spectra of Fe hydroxide minerals (Fh, Goe, Hem, Aka, Lep) and aqueous Fe species (FeNitr02MHNO3, FeNitr02h and FeNitr05h) from (Zhu et al., 2016).

**S.I. 2** The molar fractions of  $\mu$ -oxo dimer,  $\text{Fe}(\text{H}_2\text{O})_6^{3+}$ ,  $\text{Fe}(\text{OH})(\text{H}_2\text{O})_6^{2+}$  and  $\text{Fe}(\text{OH})_3(\text{H}_2\text{O})_3$  in FeNitr02MHNO3, FeNitr02h and FeNitr05h (Zhu et al., 2016).

| Standards     | $\mu$ -oxo dimer | $\text{Fe}(\text{H}_2\text{O})_6^{3+}$ | $\text{Fe}(\text{OH})(\text{H}_2\text{O})_6^{2+}$ | $\text{Fe}(\text{OH})_3(\text{H}_2\text{O})_3$ |
|---------------|------------------|----------------------------------------|---------------------------------------------------|------------------------------------------------|
| FeNitr05h     | 0.470            | 0.477                                  | 0.053                                             | $1.26 \times 10^{-10}$                         |
| FeNitr02h     | 0.271            | 0.689                                  | 0.040                                             | $2.63 \times 10^{-11}$                         |
| FeNitr02MHNO3 | 0.128            | 0.843                                  | 0.028                                             | $5.72 \times 10^{-12}$                         |

### S.I. 3 Time-resolved UV-Vis spectra of the immediate products during the ferrihydrite formation in three systems.

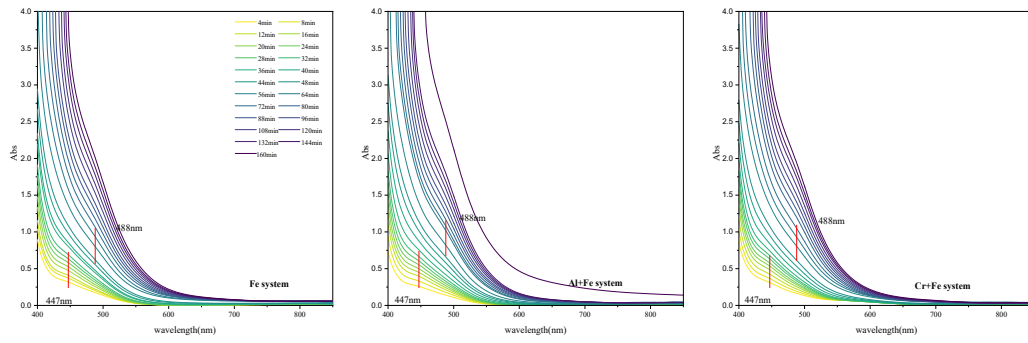

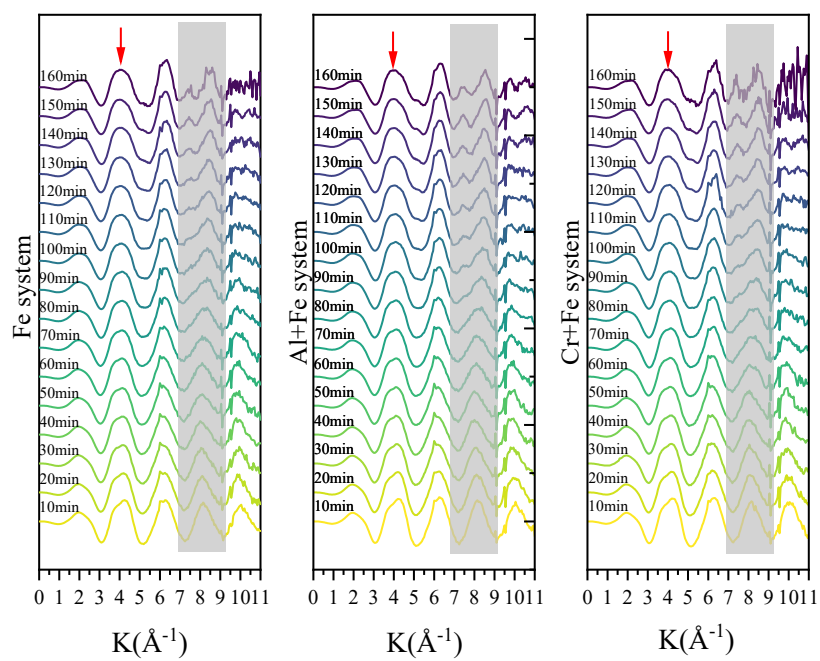

**S.I. 4** Time-resolved Fe K-edge EXAFS spectra of reaction intermediates in the three systems.

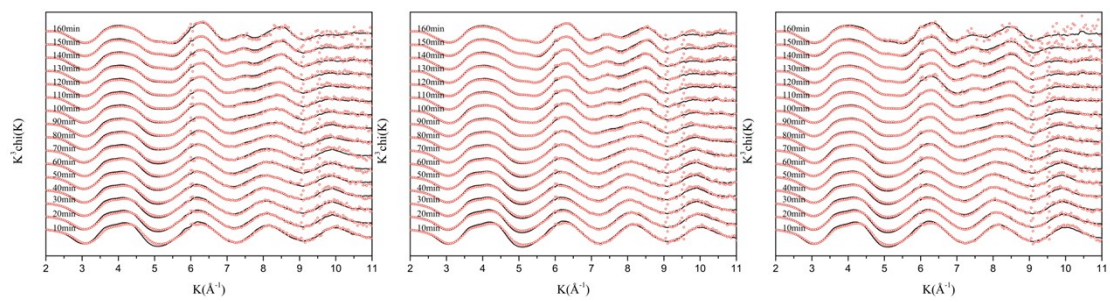

**S.I. 5** Linear combination fitting of Fe K-edge EXAFS spectra of the reaction intermediates in the three systems (red circles is experimental data; black line is fitting data. Left: Fe system, middle: Al+Fe system, right: Cr+Fe system)

**S.I. 6** Evolution of the proportions of various Fe species with time during the ferrihydrite formation  
in the Fe system.

| Time<br>(min) | ferrihydrite | error  | $\mu$ -OXO<br>dimer | error | $\text{Fe}(\text{H}_2\text{O})_6^{3+}$ | error  | $\text{Fe}(\text{OH})(\text{H}_2\text{O})_6^{2+}$ | error |
|---------------|--------------|--------|---------------------|-------|----------------------------------------|--------|---------------------------------------------------|-------|
| 10            | 0.00%        | /      | 37.90%              | 4.17% | 57.48%                                 | 8.87%  | 4.57%                                             | 0.56% |
| 20            | 8.40%        | 13.30% | 40.34%              | 5.05% | 46.59%                                 | 10.95% | 4.67%                                             | 0.70% |
| 30            | 11.50%       | 2.40%  | 43.68%              | 1.13% | 40.09%                                 | 1.14%  | 4.84%                                             | 0.13% |
| 40            | 12.10%       | 5.70%  | 44.65%              | 4.41% | 38.34%                                 | 9.39%  | 4.93%                                             | 0.60% |
| 50            | 19.20%       | 4.30%  | 42.89%              | 5.85% | 33.18%                                 | 11.37% | 4.65%                                             | 0.78% |
| 60            | 28.00%       | 3.50%  | 34.20%              | 3.28% | 33.94%                                 | 5.89%  | 3.87%                                             | 0.43% |
| 70            | 33.70%       | 2.60%  | 31.82%              | 1.22% | 30.59%                                 | 1.24%  | 3.90%                                             | 0.14% |
| 80            | 39.20%       | 2.50%  | 28.84%              | 1.18% | 28.73%                                 | 1.19%  | 3.22%                                             | 0.13% |
| 90            | 47.60%       | 2.10%  | 24.06%              | 0.99% | 25.61%                                 | 1.00%  | 2.74%                                             | 0.11% |
| 100           | 52.80%       | 4.10%  | 19.84%              | 1.87% | 25.01%                                 | 3.68%  | 2.35%                                             | 0.24% |
| 110           | 58.30%       | 9.60%  | 16.02%              | 5.05% | 23.69%                                 | 7.82%  | 1.99%                                             | 0.63% |
| 120           | 62.70%       | 9.70%  | 16.33%              | 5.13% | 19.08%                                 | 7.93%  | 1.88%                                             | 0.64% |
| 130           | 68.70%       | 9.40%  | 12.85%              | 9.18% | 16.93%                                 | 23.58% | 1.51%                                             | 1.33% |
| 140           | 80.20%       | 4.70%  | 8.03%               | 2.14% | 10.84%                                 | 4.17%  | 0.91%                                             | 0.28% |
| 150           | 85.10%       | 10.90% | 6.75%               | 5.77% | 7.39%                                  | 8.91%  | 0.75%                                             | 0.72% |
| 160           | 91.30%       | 2.80%  | 1.64%               | 1.32% | 6.90%                                  | 1.34%  | 0.23%                                             | 0.15% |

**S.I. 7** Percentage of different Fe species with time in the Al+Fe system.

| Time (min) | ferrihydrate | error  | $\mu$ -OXO dimer | error | $\text{Fe}(\text{H}_2\text{O})_6^{3+}$ | error  | $\text{Fe}(\text{OH})(\text{H}_2\text{O})_6^{2+}$ | error |
|------------|--------------|--------|------------------|-------|----------------------------------------|--------|---------------------------------------------------|-------|
| 10         | 0.00%        | /      | 29.63%           | 2.03% | 66.29%                                 | 4.49%  | 4.02%                                             | 0.28% |
| 20         | 0.00%        | /      | 36.56%           | 4.84% | 58.83%                                 | 17.36% | 4.61%                                             | 0.79% |
| 30         | 5.20%        | 2.40%  | 40.13%           | 1.13% | 49.89%                                 | 1.14%  | 4.81%                                             | 0.13% |
| 40         | 3.70%        | 2.80%  | 48.28%           | 1.32% | 42.76%                                 | 1.34%  | 5.40%                                             | 0.15% |
| 50         | 9.80%        | 2.80%  | 44.52%           | 1.32% | 40.68%                                 | 1.34%  | 5.04%                                             | 0.15% |
| 60         | 19.10%       | 2.30%  | 40.20%           | 1.08% | 36.23%                                 | 1.10%  | 4.50%                                             | 0.12% |
| 70         | 27.10%       | 2.20%  | 36.01%           | 1.03% | 32.89%                                 | 1.05%  | 4.01%                                             | 0.12% |
| 80         | 37.90%       | 2.10%  | 28.77%           | 0.99% | 29.96%                                 | 1.00%  | 3.28%                                             | 0.11% |
| 90         | 51.60%       | 4.40%  | 21.33%           | 1.98% | 24.61%                                 | 3.86%  | 2.45%                                             | 0.26% |
| 100        | 60.70%       | 4.30%  | 15.36%           | 1.92% | 22.09%                                 | 3.73%  | 1.72%                                             | 0.25% |
| 110        | 69.70%       | 8.70%  | 7.93%            | 4.61% | 21.06%                                 | 7.12%  | 1.21%                                             | 0.58% |
| 120        | 73.30%       | 10.80% | 8.98%            | 2.02% | 16.55%                                 | 5.07%  | 1.17%                                             | 0.30% |
| 130        | 78.30%       | 4.70%  | 10.56%           | 2.14% | 10.00%                                 | 4.17%  | 1.13%                                             | 0.28% |
| 140        | 88.80%       | 4.70%  | 5.87%            | 2.10% | 4.74%                                  | 4.13%  | 0.57%                                             | 0.27% |
| 150        | 92.90%       | 2.10%  | 6.40%            | 0.57% | 0.58%                                  | 1.45%  | 0.12%                                             | 0.08% |
| 160        | 93.50%       | 2.60%  | 6.27%            | 1.22% | 0.00%                                  | 1.24%  | 0.56%                                             | 0.14% |



**S.I. 8** Percentage of different Fe species with time in the Cr+Fe system.

| Time (min) | ferrihydrate | error | $\mu$ -OXO dimer | error | $\text{Fe}(\text{H}_2\text{O})_6^{3+}$ | error  | $\text{Fe}(\text{OH})(\text{H}_2\text{O})_6^{2+}$ | error |
|------------|--------------|-------|------------------|-------|----------------------------------------|--------|---------------------------------------------------|-------|
| 10         | 0.00%        | /     | 29.52%           | 3.65% | 66.41%                                 | 15.00% | 4.02%                                             | 0.64% |
| 20         | 0.00%        | /     | 39.40%           | 4.40% | 55.82%                                 | 15.38% | 4.76%                                             | 0.71% |
| 30         | 5.90%        | 9.50% | 39.47%           | 5.05% | 49.93%                                 | 7.82%  | 4.72%                                             | 0.63% |
| 40         | 8.30%        | 5.40% | 46.26%           | 0.55% | 40.36%                                 | 3.62%  | 5.09%                                             | 0.12% |
| 50         | 10.10%       | 2.60% | 43.38%           | 1.22% | 41.63%                                 | 1.24%  | 4.92%                                             | 0.14% |
| 60         | 22.50%       | 2.50% | 38.69%           | 1.18% | 34.55%                                 | 1.19%  | 4.27%                                             | 0.13% |
| 70         | 35.80%       | 3.60% | 30.24%           | 1.63% | 30.56%                                 | 3.15%  | 3.39%                                             | 0.21% |
| 80         | 42.60%       | 2.20% | 25.96%           | 1.03% | 28.35%                                 | 1.05%  | 3.00%                                             | 0.12% |
| 90         | 48.00%       | 9.10% | 21.43%           | 4.83% | 27.99%                                 | 7.47%  | 2.59%                                             | 0.60% |
| 100        | 54.00%       | 4.30% | 20.55%           | 1.98% | 23.10%                                 | 3.86%  | 2.35%                                             | 0.26% |
| 110        | 65.30%       | 4.10% | 16.02%           | 1.87% | 16.87%                                 | 3.68%  | 1.80%                                             | 0.24% |
| 120        | 71.90%       | 4.80% | 12.76%           | 0.39% | 13.82%                                 | 2.46%  | 1.40%                                             | 0.08% |
| 130        | 79.90%       | 2.10% | 5.29%            | 0.57% | 14.10%                                 | 1.45%  | 0.82%                                             | 0.08% |
| 140        | 88.60%       | 4.80% | 7.00%            | 2.20% | 3.71%                                  | 4.31%  | 0.67%                                             | 0.29% |
| 150        | 85.70%       | 3.50% | 8.35%            | 1.65% | 5.08%                                  | 1.67%  | 0.87%                                             | 0.19% |
| 160        | 91.32%       | 5.70% | 0.05%            | 0.73% | 8.41%                                  | 4.81%  | 0.22%                                             | 0.16% |

**S.I. 9** R factor and  $\Delta R$  factor% obtained from EXAFS LCF analysis.

|                 | Time<br>(min) | R-factor |               |                |                |                |                | $\Delta R$ factor% <sup>&amp;</sup> |                |                |                |                |
|-----------------|---------------|----------|---------------|----------------|----------------|----------------|----------------|-------------------------------------|----------------|----------------|----------------|----------------|
|                 |               | DS*      | DS with<br>Fh | DS with<br>Goe | DS with<br>Hem | DS with<br>Aka | DS with<br>Lep | DS with<br>Fh                       | DS with<br>Goe | DS with<br>Hem | DS with<br>Aka | DS with<br>Lep |
| Fe<br>system    | 10            | 0.058    | 0.052         | 0.052          | 0.056          | 0.054          | 0.058          | -10.90%                             | -10.10%        | -4.30%         | -6.10%         | -0.50%         |
|                 | 20            | 0.041    | 0.033         | 0.037          | 0.04           | 0.037          | 0.041          | -19.51%                             | -8.70%         | -3.50%         | -8.90%         | -0.40%         |
|                 | 30            | 0.042    | 0.033         | 0.039          | 0.041          | 0.038          | 0.042          | -21.50%                             | -8.00%         | -2.50%         | -9.40%         | -1.10%         |
|                 | 40            | 0.043    | 0.033         | 0.039          | 0.042          | 0.038          | 0.043          | -25.00%                             | -10.70%        | -4.50%         | -12.20%        | -2.10%         |
|                 | 50            | 0.043    | 0.03          | 0.037          | 0.041          | 0.036          | 0.041          | -30.30%                             | -13.70%        | -4.60%         | -15.90%        | -4.20%         |
|                 | 60            | 0.054    | 0.029         | 0.042          | 0.051          | 0.04           | 0.05           | -45.40%                             | -22.70%        | -6.20%         | -26.60%        | -8.00%         |
|                 | 70            | 0.062    | 0.028         | 0.044          | 0.056          | 0.04           | 0.057          | -54.40%                             | -29.00%        | -9.80%         | -35.40%        | -9.30%         |
|                 | 80            | 0.065    | 0.027         | 0.042          | 0.06           | 0.039          | 0.054          | -58.00%                             | -35.20%        | -7.60%         | -40.50%        | -17.60%        |
|                 | 90            | 0.077    | 0.024         | 0.047          | 0.067          | 0.04           | 0.065          | -68.50%                             | -39.40%        | -12.60%        | -48.40%        | -15.90%        |
|                 | 100           | 0.104    | 0.024         | 0.054          | 0.091          | 0.045          | 0.078          | -77.30%                             | -47.60%        | -12.40%        | -56.70%        | -25.20%        |
|                 | 110           | 0.12     | 0.024         | 0.059          | 0.104          | 0.047          | 0.088          | -80.40%                             | -50.90%        | -13.10%        | -61.20%        | -27.00%        |
|                 | 120           | 0.144    | 0.022         | 0.064          | 0.123          | 0.049          | 0.105          | -84.60%                             | -55.40%        | -14.20%        | -66.00%        | -27.30%        |
|                 | 130           | 0.164    | 0.025         | 0.073          | 0.141          | 0.054          | 0.117          | -84.80%                             | -55.80%        | -14.00%        | -66.80%        | -29.00%        |
|                 | 140           | 0.205    | 0.027         | 0.087          | 0.173          | 0.062          | 0.15           | -86.80%                             | -57.50%        | -15.60%        | -69.70%        | -27.00%        |
|                 | 150           | 0.226    | 0.026         | 0.092          | 0.191          | 0.065          | 0.16           | -88.50%                             | -59.40%        | -15.70%        | -71.10%        | -29.30%        |
|                 | 160           | 0.22     | 0.039         | 0.089          | 0.186          | 0.067          | 0.154          | -82.40%                             | -59.60%        | -15.70%        | -69.70%        | -30.10%        |
| Al+Fe<br>system | 10            | 0.036    | 0.032         | 0.033          | 0.035          | 0.033          | 0.036          | -11.11%                             | -8.80%         | -3.20%         | -9.90%         | -0.10%         |
|                 | 20            | 0.031    | 0.027         | 0.03           | 0.031          | 0.03           | 0.031          | -14.70%                             | -6.00%         | -1.50%         | -6.10%         | 0.00%          |
|                 | 30            | 0.031    | 0.023         | 0.03           | 0.031          | 0.029          | 0.031          | -25.80%                             | -5.30%         | -1.20%         | -6.30%         | -0.30%         |
|                 | 40            | 0.033    | 0.026         | 0.032          | 0.033          | 0.031          | 0.033          | -21.21%                             | -10.60%        | -2.50%         | -6.70%         | -0.30%         |
|                 | 50            | 0.036    | 0.028         | 0.032          | 0.035          | 0.031          | 0.036          | -23.60%                             | -13.50%        | -4.00%         | -13.50%        | -1.60%         |
|                 | 60            | 0.041    | 0.024         | 0.033          | 0.039          | 0.03           | 0.038          | -41.90%                             | -21.50%        | -4.70%         | -26.10%        | -6.90%         |

|        |     |       |       |       |       |       |       |         |         |         |         |         |
|--------|-----|-------|-------|-------|-------|-------|-------|---------|---------|---------|---------|---------|
|        | 70  | 0.049 | 0.022 | 0.035 | 0.046 | 0.031 | 0.043 | -55.60% | -33.30% | -6.20%  | -36.90% | -12.50% |
|        | 80  | 0.061 | 0.019 | 0.035 | 0.054 | 0.029 | 0.05  | -69.50% | -43.30% | -11.40% | -53.10% | -17.90% |
|        | 90  | 0.092 | 0.021 | 0.048 | 0.08  | 0.038 | 0.072 | -77.20% | -62.20% | -12.60% | -58.60% | -21.50% |
|        | 100 | 0.115 | 0.019 | 0.055 | 0.099 | 0.039 | 0.084 | -83.80% | -57.90% | -13.30% | -65.70% | -26.60% |
|        | 110 | 0.137 | 0.019 | 0.056 | 0.116 | 0.039 | 0.101 | -86.40% | -60.30% | -15.60% | -71.30% | -26.70% |
|        | 120 | 0.159 | 0.028 | 0.069 | 0.139 | 0.05  | 0.107 | -82.20% | -64.40% | -12.10% | -68.60% | -32.20% |
|        | 130 | 0.192 | 0.021 | 0.072 | 0.16  | 0.046 | 0.135 | -89.00% | -63.90% | -16.50% | -76.20% | -29.80% |
|        | 140 | 0.221 | 0.021 | 0.083 | 0.184 | 0.051 | 0.156 | -90.40% | -67.20% | -16.80% | -76.90% | -29.60% |
|        | 150 | 0.283 | 0.028 | 0.105 | 0.228 | 0.06  | 0.202 | -90.30% | -70.80% | -19.20% | -78.80% | -28.40% |
|        | 160 | 0.26  | 0.029 | 0.09  | 0.213 | 0.055 | 0.179 | -89.00% | -59.70% | -18.10% | -78.70% | -31.20% |
|        | 10  | 0.033 | 0.028 | 0.031 | 0.032 | 0.03  | 0.033 | -15.50% | -5.90%  | -3.80%  | -7.90%  | 0.00%   |
|        | 20  | 0.026 | 0.024 | 0.025 | 0.026 | 0.025 | 0.026 | -10.50% | -3.90%  | -1.30%  | -4.10%  | 0.00%   |
|        | 30  | 0.029 | 0.023 | 0.027 | 0.028 | 0.027 | 0.029 | -20.69% | -5.80%  | -2.20%  | -6.40%  | -0.10%  |
|        | 40  | 0.028 | 0.022 | 0.025 | 0.027 | 0.024 | 0.028 | -22.50% | -9.70%  | -4.00%  | -12.50% | -0.80%  |
|        | 50  | 0.036 | 0.027 | 0.032 | 0.034 | 0.03  | 0.035 | -23.80% | -11.90% | -5.20%  | -15.20% | -2.30%  |
|        | 60  | 0.046 | 0.024 | 0.033 | 0.042 | 0.03  | 0.041 | -47.40% | -27.10% | -7.00%  | -33.90% | -10.30% |
|        | 70  | 0.059 | 0.019 | 0.036 | 0.051 | 0.029 | 0.052 | -68.00% | -39.70% | -13.50% | -51.40% | -12.10% |
| Cr+Fe  | 80  | 0.071 | 0.019 | 0.038 | 0.062 | 0.031 | 0.057 | -73.10% | -46.90% | -12.40% | -57.10% | -19.80% |
| system | 90  | 0.085 | 0.018 | 0.042 | 0.074 | 0.032 | 0.067 | -78.90% | -50.90% | -13.10% | -62.90% | -21.50% |
|        | 100 | 0.103 | 0.018 | 0.047 | 0.088 | 0.033 | 0.079 | -82.30% | -54.20% | -14.30% | -68.00% | -23.70% |
|        | 110 | 0.13  | 0.017 | 0.051 | 0.107 | 0.034 | 0.097 | -86.80% | -60.90% | -17.40% | -74.10% | -25.20% |
|        | 120 | 0.163 | 0.025 | 0.061 | 0.131 | 0.04  | 0.122 | -84.80% | -62.60% | -19.90% | -75.20% | -25.00% |
|        | 130 | 0.189 | 0.02  | 0.07  | 0.154 | 0.043 | 0.137 | -89.40% | -63.00% | -18.70% | -77.10% | -27.50% |
|        | 140 | 0.227 | 0.022 | 0.076 | 0.181 | 0.046 | 0.163 | -90.10% | -66.30% | -20.20% | -79.70% | -28.00% |
|        | 150 | 0.24  | 0.021 | 0.087 | 0.203 | 0.059 | 0.16  | -91.30% | -63.80% | -15.50% | -75.60% | -33.30% |
|        | 160 | 0.329 | 0.028 | 0.179 | 0.293 | 0.144 | 0.254 | -91.50% | -45.60% | -10.90% | -56.20% | -22.70% |

\*DS is short for dissolved Fe species.

$\Delta R \text{ factor} \% = (R\text{-factor}_{\text{time}} - R\text{-factor}_{10\text{min}}) / R\text{-factor}_{10\text{min}}$ .

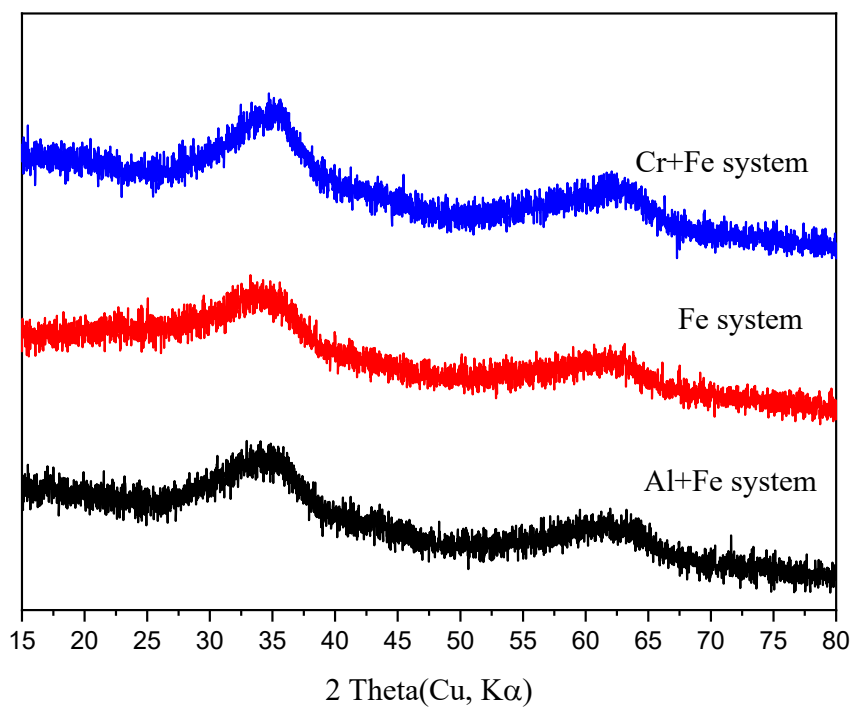

**S.I. 10** XRD patterns of the solids obtained at the end of reaction in the three systems.

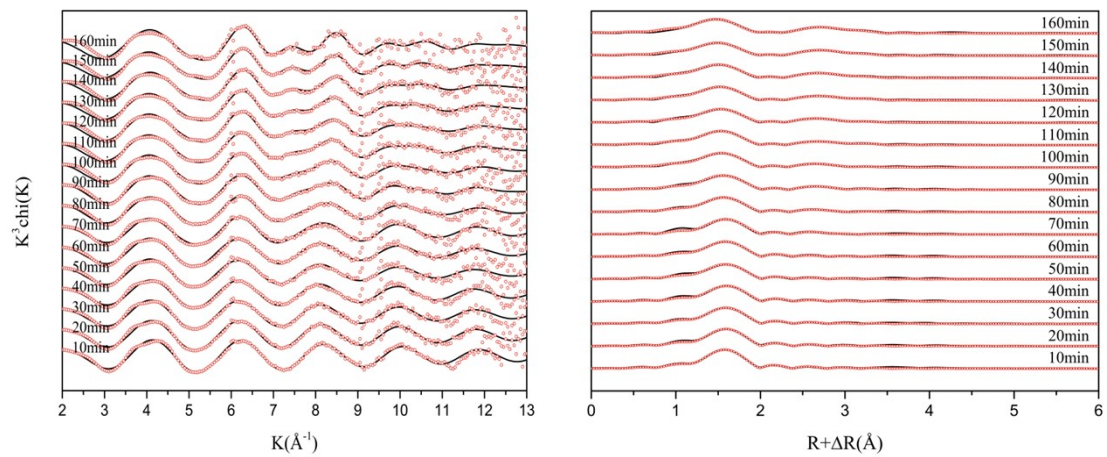

**S.I. 11** Fitting results of Fe K-edge EXAFS (left) and Fourier transformed spectra of the reaction intermediates during ferrihydrite formation in Fe system (red circles is experimental data; black line is fitting data).

**S.I. 12** Shell by shell fitting results of Fe K-edge EXAFS spectra of the reaction intermediates during ferrihydrite formation in the Fe system.

| Time (min) | Path               | CN       | $\sigma^2$     | $E_0$ (eV) | R( $\text{\AA}$ ) | R factor |
|------------|--------------------|----------|----------------|------------|-------------------|----------|
| 10         | Fe-O               | 3.8(0.3) | 0.0040(0.0006) | 0.29       | 2.012(0.005)      | 0.0122   |
| 20         | Fe-O               | 3.5(0.3) | 0.0040(0.0008) | 0.83       | 2.026(0.006)      | 0.0182   |
| 30         | Fe-O               | 3.6(0.3) | 0.0048(0.0008) | 0.34       | 2.028(0.006)      | 0.0163   |
| 40         | Fe-O               | 3.4(0.3) | 0.0046(0.0009) | 0.99       | 2.034(0.007)      | 0.0222   |
| 50         | Fe-O               | 3.7(0.4) | 0.0060(0.0011) | 0.07       | 2.030(0.008)      | 0.0269   |
| 60         | Fe-O               | 3.7(0.4) | 0.0056(0.0009) | -0.24      | 2.028(0.007)      | 0.0199   |
| 70         | Fe-O               | 3.3(0.4) | 0.0047(0.0011) | 0.10       | 2.024(0.018)      | 0.0227   |
|            | Fe-Fe <sub>1</sub> | 0.7(0.6) | 0.0119(0.0126) |            | 3.061(0.008)      |          |
| 80         | Fe-O               | 4.1(0.5) | 0.0070(0.0011) | -0.87      | 2.014(0.015)      | 0.0104   |
|            | Fe-Fe <sub>1</sub> | 1.3(1.1) | 0.0132(0.0121) |            | 3.060(0.059)      |          |
|            | Fe-Fe <sub>2</sub> | 3.2(1.1) | 0.0341(0.0654) |            | 3.358(0.008)      |          |
| 90         | Fe-O               | 4.3(0.6) | 0.0080(0.0014) | -0.67      | 2.013(0.010)      | 0.0138   |
|            | Fe-Fe <sub>1</sub> | 2.0(1.7) | 0.0163(0.0143) |            | 3.084(0.049)      |          |
|            | Fe-Fe <sub>2</sub> | 0.6(0.5) | 0.0078(0.0180) |            | 3.383(0.046)      |          |
| 100        | Fe-O               | 4.6(0.5) | 0.0083(0.0011) | -3.03      | 2.000(0.008)      | 0.0085   |
|            | Fe-Fe <sub>1</sub> | 2.2(1.6) | 0.0122(0.0071) |            | 3.060(0.028)      |          |
|            | Fe-Fe <sub>2</sub> | 2.1(0.7) | 0.0244(0.0351) |            | 3.384(0.067)      |          |
| 110        | Fe-O               | 4.4(0.4) | 0.0080(0.0009) | -3.32      | 1.996(0.006)      | 0.0058   |
|            | Fe-Fe <sub>1</sub> | 3.0(2.4) | 0.0194(0.0094) |            | 3.081(0.034)      |          |
|            | Fe-Fe <sub>2</sub> | 1.3(1.6) | 0.0101(0.0079) |            | 3.407(0.018)      |          |
| 120        | Fe-O               | 4.6(0.5) | 0.0089(0.0011) | -3.24      | 1.995(0.008)      | 0.0085   |
|            | Fe-Fe <sub>1</sub> | 2.9(2.6) | 0.0157(0.0073) |            | 3.067(0.026)      |          |
|            | Fe-Fe <sub>2</sub> | 2.3(1.7) | 0.0178(0.0160) |            | 3.398(0.036)      |          |
| 130        | Fe-O               | 4.4(0.4) | 0.0085(0.0010) | -3.88      | 1.989(0.007)      | 0.0069   |
|            | Fe-Fe <sub>1</sub> | 3.0(1.8) | 0.0172(0.0082) |            | 3.071(0.033)      |          |
|            | Fe-Fe <sub>2</sub> | 1.7(1.2) | 0.0119(0.0085) |            | 3.408(0.021)      |          |
| 140        | Fe-O               | 4.8(0.5) | 0.0095(0.0011) | -4.21      | 1.979(0.008)      | 0.0075   |
|            | Fe-Fe <sub>1</sub> | 2.5(2.6) | 0.0145(0.0082) |            | 3.052(0.036)      |          |
|            | Fe-Fe <sub>2</sub> | 1.7(1.8) | 0.0125(0.0113) |            | 3.406(0.034)      |          |
| 150        | Fe-O               | 4.8(0.4) | 0.0098(0.0010) | -5.68      | 1.975(0.007)      | 0.0055   |
|            | Fe-Fe <sub>1</sub> | 2.3(1.3) | 0.0138(0.0079) |            | 3.047(0.036)      |          |
|            | Fe-Fe <sub>2</sub> | 1.5(1.0) | 0.0094(0.0082) |            | 3.404(0.026)      |          |
| 160        | Fe-O               | 5.6(0.6) | 0.0104(0.0010) | -7.02      | 1.965(0.007)      | 0.0051   |
|            | Fe-Fe <sub>1</sub> | 3.5(2.3) | 0.0156(0.0056) |            | 3.056(0.021)      |          |
|            | Fe-Fe <sub>2</sub> | 2.6(1.8) | 0.0106(0.0046) |            | 3.383(0.013)      |          |

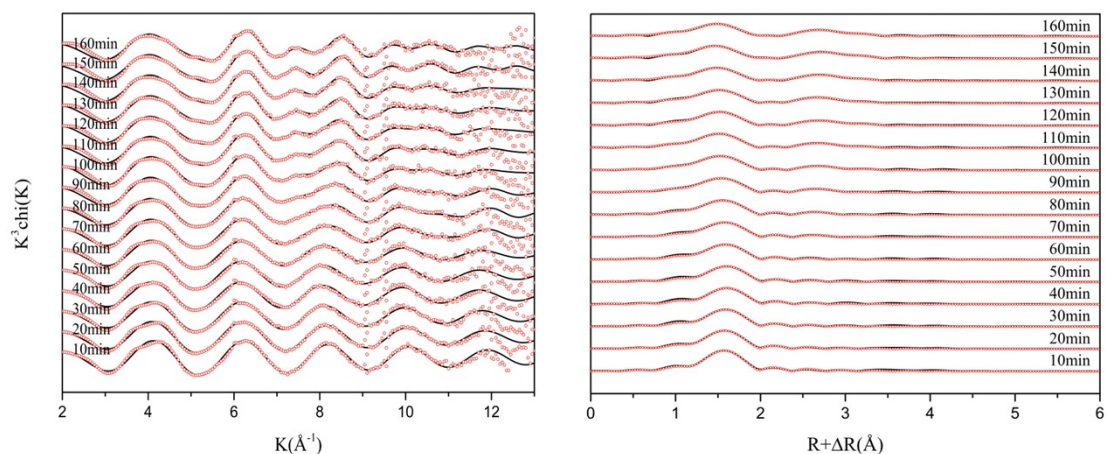

**S.I. 13** Fitting results of Fe K-edge EXAFS (left) and Fourier transformed spectra of the reaction intermediates during ferrihydrite formation in Al+Fe system (red circles is experimental data; black line is fitting data).



**S.I. 14** Shell by shell fitting results of Fe K-edge EXAFS spectra of the reaction intermediates during ferrihydrite formation in the Al+Fe system.

| Time (min) | Path               | CN       | $\sigma^2$     | $E_0$ (eV) | R( $\text{\AA}$ ) | R factor |
|------------|--------------------|----------|----------------|------------|-------------------|----------|
| 10         | Fe-O               | 4.0(0.3) | 0.0035(0.0006) | -0.53      | 2.007(0.005)      | 0.0134   |
| 20         | Fe-O               | 3.8(0.3) | 0.0040(0.0006) | -0.97      | 2.014(0.005)      | 0.0117   |
| 30         | Fe-O               | 3.6(0.3) | 0.0041(0.0007) | -0.11      | 2.026(0.006)      | 0.0152   |
| 40         | Fe-O               | 3.3(0.3) | 0.0040(0.0009) | 0.85       | 2.037(0.007)      | 0.0236   |
| 50         | Fe-O               | 3.4(0.3) | 0.0045(0.0008) | 0.68       | 2.037(0.007)      | 0.0201   |
| 60         | Fe-O               | 3.7(0.4) | 0.0056(0.0009) | -0.24      | 2.028(0.007)      | 0.0199   |
| 70         | Fe-O               | 4.0(0.4) | 0.0065(0.0010) | -0.84      | 2.022(0.008)      | 0.0155   |
|            | Fe-Me <sub>1</sub> | 0.2(0.2) | 0.0003(0.0091) | -0.84      | 3.049(0.028)      |          |
| 80         | Fe-O               | 4.2(0.4) | 0.0072(0.0009) | -2.24      | 2.010(0.006)      | 0.0107   |
|            | Fe-Me <sub>1</sub> | 0.3(0.2) | 0.0004(0.0047) |            | 3.044(0.015)      |          |
| 90         | Fe-O               | 4.7(0.5) | 0.0083(0.0011) | -3.40      | 1.998(0.008)      | 0.0096   |
|            | Fe-Me <sub>1</sub> | 0.6(1.1) | 0.0048(0.0099) |            | 3.045(0.030)      |          |
|            | Fe-Me <sub>2</sub> | 0.6(0.7) | 0.0212(0.0275) |            | 3.361(0.087)      |          |
| 100        | Fe-O               | 5.0(0.5) | 0.0092(0.0010) | -2.98      | 1.994(0.007)      | 0.0070   |
|            | Fe-Me <sub>1</sub> | 1.1(1.9) | 0.0133(0.0077) |            | 3.047(0.032)      |          |
|            | Fe-Me <sub>2</sub> | 0.9(0.7) | 0.0094(0.0126) |            | 3.392(0.032)      |          |
| 110        | Fe-O               | 4.7(0.4) | 0.0084(0.0009) | -4.76      | 1.985(0.007)      | 0.0053   |
|            | Fe-Me <sub>1</sub> | 1.5(1.4) | 0.0099(0.0063) |            | 3.049(0.029)      |          |
|            | Fe-Me <sub>2</sub> | 1.1(1.0) | 0.0105(0.0130) |            | 3.394(0.043)      |          |
| 120        | Fe-O               | 4.6(0.5) | 0.0087(0.0010) | -4.03      | 1.987(0.008)      | 0.0071   |
|            | Fe-Me <sub>1</sub> | 2.5(2.5) | 0.0144(0.0081) |            | 3.059(0.036)      |          |
|            | Fe-Me <sub>2</sub> | 1.2(1.9) | 0.0090(0.0098) |            | 3.404(0.028)      |          |
| 130        | Fe-O               | 4.7(0.5) | 0.0093(0.0011) | -4.34      | 1.985(0.008)      | 0.0066   |
|            | Fe-Me <sub>1</sub> | 2.1(1.9) | 0.0111(0.0063) |            | 3.047(0.030)      |          |
|            | Fe-Me <sub>2</sub> | 1.4(1.6) | 0.0115(0.0136) |            | 3.405(0.045)      |          |
| 140        | Fe-O               | 4.9(0.5) | 0.0098(0.0011) | -6.15      | 1.971(0.008)      | 0.0062   |
|            | Fe-Me <sub>1</sub> | 2.2(2.2) | 0.0119(0.0080) |            | 3.038(0.038)      |          |
|            | Fe-Me <sub>2</sub> | 1.3(1.5) | 0.0080(0.0101) |            | 3.398(0.034)      |          |
| 150        | Fe-O               | 5.1(0.6) | 0.0104(0.0012) | -7.71      | 1.961(0.008)      | 0.0065   |
|            | Fe-Me <sub>1</sub> | 2.1(2.3) | 0.0125(0.0111) |            | 3.018(0.046)      |          |
|            | Fe-Me <sub>2</sub> | 0.9(1.2) | 0.0033(0.0081) |            | 3.391(0.024)      |          |
| 160        | Fe-O               | 4.8(0.4) | 0.0102(0.0010) | -5.80      | 1.973(0.007)      | 0.0048   |
|            | Fe-Me <sub>1</sub> | 1.9(1.5) | 0.0111(0.0078) |            | 3.019(0.032)      |          |
|            | Fe-Me <sub>2</sub> | 0.6(0.8) | 0.0021(0.0086) |            | 3.397(0.025)      |          |

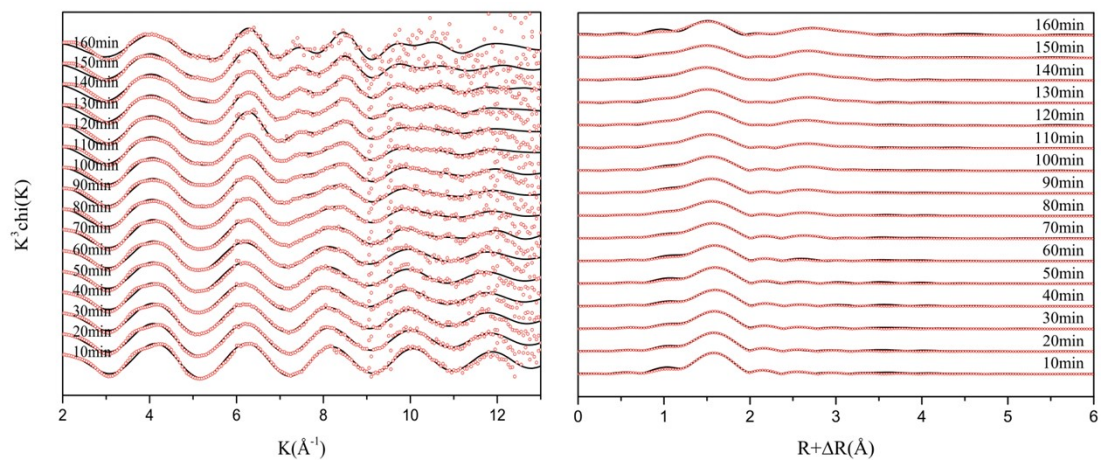

**S.I. 15** Fitting results of Fe K-edge EXAFS (left) and Fourier transformed spectra of the reaction intermediates during ferrihydrite formation in Cr+Fe system (red circles is experimental data; black line is fitting data).

**S.I. 16** Shell by shell fitting results of Fe K-edge EXAFS spectra of the reaction intermediates during ferrihydrite formation in the Cr+Fe system.

| Time (min) | Path               | CN       | $\sigma^2$     | $E_0$ (eV) | R( $\text{\AA}$ ) | R factor |
|------------|--------------------|----------|----------------|------------|-------------------|----------|
| 10         | Fe-O               | 3.8(0.3) | 0.0030(0.0007) | 0.16       | 2.011(0.005)      | 0.0134   |
| 20         | Fe-O               | 3.9(0.3) | 0.0042(0.0007) | -0.63      | 2.017(0.006)      | 0.0148   |
| 30         | Fe-O               | 3.7(0.3) | 0.0043(0.0007) | -0.24      | 2.024(0.006)      | 0.0152   |
| 40         | Fe-O               | 3.6(0.3) | 0.0048(0.0009) | 0.77       | 2.034(0.007)      | 0.0193   |
| 50         | Fe-O               | 3.6(0.4) | 0.0049(0.0010) | 0.35       | 2.032(0.007)      | 0.0251   |
| 60         | Fe-O               | 3.8(0.4) | 0.0057(0.0011) | 0.23       | 2.028(0.008)      | 0.0290   |
| 70         | Fe-O               | 4.2(0.4) | 0.0070(0.0009) | -0.59      | 2.017(0.007)      | 0.0108   |
|            | Fe-Me <sub>1</sub> | 0.3(0.2) | 0.0013(0.0054) |            | 3.042(0.017)      |          |
| 80         | Fe-O               | 4.5(0.5) | 0.0079(0.0011) | -2.06      | 2.012(0.008)      | 0.0088   |
|            | Fe-Me <sub>1</sub> | 1.5(1.5) | 0.0117(0.0080) |            | 3.056(0.036)      |          |
|            | Fe-Me <sub>2</sub> | 2.8(2.4) | 0.0292(0.0420) |            | 3.361(0.065)      |          |
| 90         | Fe-O               | 4.5(0.5) | 0.0080(0.0012) | -1.83      | 2.009(0.008)      | 0.0102   |
|            | Fe-Me <sub>1</sub> | 1.9(1.8) | 0.0127(0.0074) |            | 3.061(0.031)      |          |
|            | Fe-Me <sub>2</sub> | 3.9(2.1) | 0.0303(0.0353) |            | 3.381(0.056)      |          |
| 100        | Fe-O               | 4.3(0.5) | 0.0078(0.0012) | -2.59      | 2.002(0.009)      | 0.0104   |
|            | Fe-Me <sub>1</sub> | 2.2(1.4) | 0.0082(0.0075) |            | 3.052(0.024)      |          |
|            | Fe-Me <sub>2</sub> | 1.3(2.4) | 0.0202(0.0419) |            | 3.407(0.111)      |          |
| 110        | Fe-O               | 4.8(0.5) | 0.0092(0.0010) | -3.95      | 1.993(0.007)      | 0.0066   |
|            | Fe-Me <sub>1</sub> | 2.3(2.0) | 0.0142(0.0070) |            | 3.059(0.028)      |          |
|            | Fe-Me <sub>2</sub> | 1.5(1.1) | 0.0121(0.0100) |            | 3.391(0.026)      |          |
| 120        | Fe-O               | 5.1(0.4) | 0.0096(0.0008) | -3.95      | 1.991(0.006)      | 0.0041   |
|            | Fe-Me <sub>1</sub> | 2.5(2.7) | 0.0194(0.0046) |            | 3.065(0.017)      |          |
|            | Fe-Me <sub>2</sub> | 4.6(3.1) | 0.0186(0.0065) |            | 3.389(0.015)      |          |
| 130        | Fe-O               | 4.9(0.4) | 0.0095(0.0009) | -5.25      | 1.980(0.007)      | 0.0045   |
|            | Fe-Me <sub>1</sub> | 2.5(2.0) | 0.0138(0.0066) |            | 3.045(0.031)      |          |
|            | Fe-Me <sub>2</sub> | 1.2(1.5) | 0.0085(0.0076) |            | 3.395(0.023)      |          |
| 140        | Fe-O               | 5.3(0.6) | 0.0107(0.0011) | -6.40      | 1.973(0.008)      | 0.0059   |
|            | Fe-Me <sub>1</sub> | 2.4(2.2) | 0.0129(0.0078) |            | 3.036(0.036)      |          |
|            | Fe-Me <sub>2</sub> | 1.2(1.5) | 0.0062(0.0074) |            | 3.386(0.023)      |          |
| 150        | Fe-O               | 4.7(0.5) | 0.0100(0.0011) | -6.02      | 1.978(0.009)      | 0.0064   |
|            | Fe-Me <sub>1</sub> | 1.2(1.0) | 0.0059(0.0063) |            | 3.021(0.029)      |          |
|            | Fe-Me <sub>2</sub> | 1.0(1.4) | 0.0066(0.0123) |            | 3.419(0.036)      |          |
| 160        | Fe-O               | 3.5(0.7) | 0.0058(0.0018) | -4.79      | 1.977(0.014)      | 0.0244   |
|            | Fe-Me <sub>1</sub> | 1.8(1.8) | 0.0092(0.0157) |            | 3.026(0.058)      |          |
|            | Fe-Me <sub>2</sub> | 1.5(1.3) | 0.0077(0.0193) |            | 3.413(0.069)      |          |



**S.I. 17** A proposed conversion pathway of  $\mu$ -oxo to dihydroxo dimer.

**Step 1:** dehydration (MIN1  $\rightarrow$  TS1  $\rightarrow$  MIN2): One H<sub>2</sub>O molecule is moved from the inner-sphere to the outer-sphere.

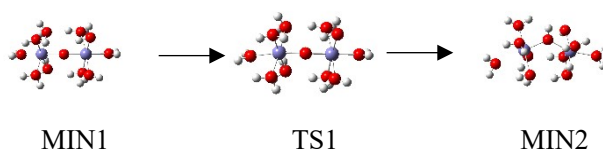

**Step 2:** protonation (MIN2  $\rightarrow$  TS2  $\rightarrow$  MIN3): The  $\mu$ -oxo O gets one H<sup>+</sup> from a H<sub>2</sub>O molecule. Then the H<sub>2</sub>O molecule becomes OH.

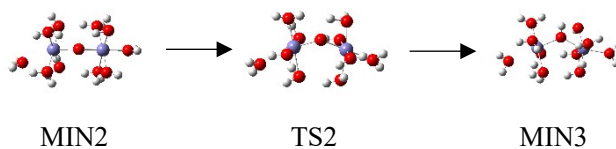

**Step 3:** ring closure (MIN3  $\rightarrow$  TS3  $\rightarrow$  MIN4): The OH-binds to the other Fe and forms a new bridge Fe–OH–Fe, and consequently, the dihydroxo bridge forms.

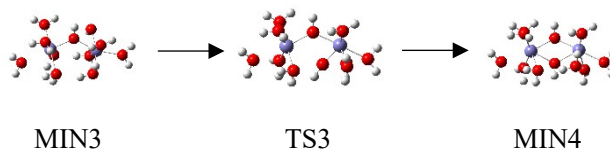

## References

Zhu, M., Frandsen, C., Wallace, A.F., Legg, B., Khalid, S., Zhang, H., Mørup, S., Banfield, J.F., Waychunas, G.A., 2016. Precipitation pathways for ferrihydrite formation in acidic solutions. *Geochimica et Cosmochimica Acta* 172, 247-264.
